# Supplementary material for: Improving 3-day deterministic air pollution forecasts using machine learning algorithms
Source: Copernicus journal article supplement (doi:10.5194/acp-2023-38), 2023-02-08
Supplement: Supplementary file [file acp-2023-38-AC1-supplement.pdf]

Response letter for reviews of “Improving 3-day deterministic air pollution forecasts using machine learning algorithms”

We thank both referees for valuable comments.

Referee comments in black and replies in *blue, italics*.

#### Replies to Referee #1

The authors present several ML models for air quality forecasting focusing on PM10, NOx and compare those results against deterministic forecasts. The dataset used to train ML models focuses on Stockholm. Overall, the authors show that the ML investigated seem to outperform the deterministic forecasts over the periods that the models were tested on, which were 1-, 2-, and 3-days in length periods. The ML models considered are very standard methods used widely in the literature, and are probably the appropriate starting points given the structure and size of training data. The authors additionally show some feature importance results.

In my opinion the length of this paper is too long and the results section needs to be shortened, the overall results summarized, and the key findings should be emphasized more. Both Table 2 and 4 could go to the Appendix as well as most of the figures in the results section. It might be easier to present/condense the text results in the tables as figures. I think the feature importance plots should be in the main text.

#### *Reply:*

*It is true that we used standard machine learning models for longer-term air quality prediction. The contribution is not applying the most state of the art ML models but demonstrating the improvement of data-driven ML models on such kind of prediction problem over conventional deterministic models, which fits the scope of this journal. Even without very advanced ML modelling structure, the complexity and amount of the work is large concerning the setup of the longer-term forecasting scheme, empirical modelling work with different sites, analysis of the prediction results and so on. Meanwhile, these algorithms have been implemented in a real AQ prediction system for Stockholm city. Therefore, the paper has a lot of material, leading to current length. We have tried to shorten the paper but it ends up with some extension to answer referees comments.*

*The reason Table 2 and 4 are kept in the main text is that they show the differences in 1-, 2- and 3-day forecasts for the different models and pollutants, which is not shown in the Figures. It is difficult to condense these in a Figure.*

*In fact, adding all feature importance plots to main text makes the presentation of the results even more difficult to follow. In that case, we have to add more illustrations, making the paper even longer than current version.*

In the abstract it is wrongly stated that one cannot subject LSTMs to feature importance methods. A google search provides examples of how this can be performed. I think the authors need to investigate a gradient-based feature importance method for the LSTM and compare that model against the other models investigated, since the application of feature importance alongside the usage of ML models for longer-term horizon prediction is a main focus of their paper.

*Reply:*

*Thank you for the comments. We agree with the referee that the statement is not correct. The statement in the abstract is due to some misunderstanding in our communication. We have now revised the texts and included feature importance also for LSTM.*

*However, how to interpret feature importance has been a side-line topic for understanding the RNN model. On the other side, one essential idea of RNN is to automate the feature engineering process because the importance of features can be trained by adjusting the weights of the connections. For RNN, there are some methods in recent studies for ranking the feature importance e.g. gradient-based, perturbation-based, or Shaley value sampling approaches etc(Ismail et al., 2020). But the interpretation of the results could be different for the same model. Also, there are issues such that the gradient-based method calculates temporally varying rankings making the ranking of featrues depend on the testing set..*

*But, even so, we have added gradient-based feature importance results for the LSTM model in which the results are the average of the gradients of all samples for each testing set. The results are shown in Appendix B and Appendix E.*

Furthermore, the authors did not mention which importance method was used for the tree-based models. There are now a variety of methods available for these models, which often do not agree on the importance ranking. For the XGB model, how do other feature importance metrics (potentially such as the permutation and SHAP importance) compare to what was used?

*Reply:*

*We have added some details at the end of subsection 2.4. For the RandomForest and XGBoost models, feature importance is ranked based on the mean decrease in impurity, which also serves for feature selection of the models. There are other approaches to measure feature importance such as (Zhou et al., 2021) but this is beyond the scope of our current study.*

It is not clear in the paper how the data sources were combined and then split into training, and validation splits.

Furthermore, it was not stated if any preprocessing of the data was performed (which probably needed to be carried out given the different ranges the input quantities cover). How large was the data set?

*Reply:*

*We have added a Table to illustrate the basics of four datasets at the end of subsection 2.1, as well as making the datasets publicly available for easy viewing and further investigation.*

*Regarding data splitting, we split the dataset along the time axis into non-overlapping training, validation and test data in a ratio of 16:4:5. That is, the validation set is the latter 20% of the total training set and the test set is the latter 20% of the total data set.*

*In the pre-processing process, outliers, such as negative pollutant measurements, are identified and removed and furthermore, standard methods, such as interpolation, are applied to handle missing values in the data. Given the current length of the paper, adding such details will not benefit the paper's readability. But we have added a description in subsection 2.1 as follows:*

*“The measurement data with a missing rate of less than 5% and missing values are replaced with mean values of available data in the neighbourhood according to the respective autocorrelation properties.”*

The authors state that the ML models were trained on the same data; were the tree models trained on randomized (tabular) data, or was it split some other way (was the time-dependence preserved)?

*Reply:*

*We have added an explanation in subsection 2.4 below.*

*“Due to the temporal correlation of the air pollutant concentrations, the principal assumption of cross-validation is not satisfied. To preserve the time-dependent property, “TimeSeriesSplit” was chosen as the cross-validation strategy. In the  $k_{th}$  split, it turns the first  $k$  folds as the training set, and the  $(k+1)_{th}$  fold as the test set. The value of parameter  $k$  is set as 5.”*

Figure 3 makes sense for the LSTM; however I think the authors could extend the figure to include some more schematic details pertaining to the tree-based models studied (and a schematic LSTM could be helpful as well).

*Reply:*

*Figure 3 describes a rolling prediction scheme, not only for LSTM but also for the other machine learning methods. The graph emphasizes that we have a prediction horizon of 24, 48, 36 hours. Note that this is not sequence to sequence model that is typical for RNN, and we only predict a single value at 24, 48 or 36. The values in the delayed horizon are used to calculate features e.g. statistics of the inputs.*

**Models**

It becomes clear that there are in fact many models being used. How many relative to (presumably) Figure 4 (it currently says “Fel! Hittar inte referenskalla”)? The authors should probably add some comments about how this considerably complexifies the overall model pipeline, relative to one single model being used, and limits model(s) generalizability. Is this really a better solution relative to one single LSTM in terms of complexity?

*Reply:*

*The erroneous reference for Figure 4 has been corrected.*

*The idea of using several models is to compare the performance of different machine learners in improving the deterministic forecasts. There are advantages and disadvantages associated with different models and we show that the performance of the models depend on pollutant and site. RNN has been widely applied for AQ prediction in literature but not so much for longer term prediction like we did. A limitation applying RNN in environmental science is the difficulty in interpreting the result. The conventional ML methods have some advantages in this aspect. In this study, one main concern is to deploy feasible algorithms for a real AQ prediction system. It updates the training process regularly once new data is accumulated. Relatively simpler algorithms are appreciated at the moment, as the current system does not have extensive GPU resource for training. Nevertheless, for research we go beyond the current ML algorithms and use our national HPC resources for deep learning models.*

There is no detail provided on model and training hyperparameters, and whether hyperparameter optimization was performed, for any of the models. How large was the LSTM (how many layers, layer size, what activation functions were used, etc.). Similarly, what were the XGB parameters used? Were all of the parameters guessed (or defaults used)? Overall, the models mostly look comparable.

*Reply:*

*Thank you for the comments. We have added the detailed model parameters. These are also summarized below.*

*The two tree-based models use default parameters of the library “scikit-learn” since a rough grid search didn’t enhance the model performance significantly. We also recognize that hyperparameter tuning is needed for each dataset to get the optimal models. But the improvement is not so significant in comparison to what we achieved over the deterministic model.*

*The LSTM model consists of two layers, each with 100 neurons, and passed through a fully connected layer before the output. The activation function was a “Tanh”.The LSTM model was trained by Adam optimizer. The batch size is set as 72. The initial learning rate is 0.01 and is automatically adjusted using “ReduceLROnPlateau” with the parameter patience set to 10, i.e., training is stopped when the loss of the validation set is detected as not decreasing for 10 consecutive epochs.”*

Given the results as they are in the current manuscript, it seems the obvious choice is RF, but I think the authors also need to compare linear regression to the other models, which should be considered the baseline ML model that the others need to beat. I don’t see much value in including the GAM (other than ruling it out).

*Reply: For some statistical performance, especially bias measures, GAM gives better results. Other studies have also shown that ensemble models based on GAM can further improve predictions of concentration for some pollutants. We believe it contains useful information and prefer to keeping it in the model list.*

Finally, it was not clear if cross-validation was performed and if the presented results show ensemble averages or something else. I think by now this is a very standard procedure, and it also provides an estimate of the uncertainty present in the models prediction capabilities given the training data set (for example, the tables should be presenting mean and variances for the ensemble). Given that there are so many models at play, it might be more useful to understand when models are more or less certain in their predictions.

*Reply:*

*As mentioned in the previous response, we used the cross-validation method of TimeSeriesSplit to preserve the time-dependent properties. In addition, we trained by setting different random number seeds, after several iterations, to obtain the optimal results. In the face of so many models, how to combine multivariate data and construct a unified model framework will be the next step of our research.*

Other

Most of the results in later figures show the mean of 1-,2-,3- day forecasts. How does the performance depend on day?

*Reply: A comparison of the performance for 1-, 2- and 3-day forecasts is show in Table 2.*

I'd rather the authors show the coefficient of determination (e.g. R2) alongside/rather than the Pearson coefficient.

*Reply: It is possible of course, but questionable if the extra work is worth it as the conclusions will be the same.*

Line 10: The deterministic predictions are used as models' inputs but at which time? Is it the current prediction (and the models' job is to correct CAMS?).

*Reply: The deterministic forecasts starts from 01:00 (mean value for 00:00 to 01:00) and are provided for all coming 24, 48 or 72 hours. The MLs job is to improve the deterministic forecasts, which are based on both CAMS and the local Gaussian and Street canyon model.*

Throughout the paper the authors use "MLs" but this should probably read ML models for grammatical consistency.

*Reply: Yes, we have changed this.*

In Figure 5 when there is a large drop just after September 20, what did the XAI method claim was the important feature(s). Is there anything different about the inputs to the model on that date?

*Reply: We have not evaluated the importance of features for specific short time periods. Such analysis might be something to include in a future study.*

#### *References*

*Ismail, A. A., Gunady, M., Corrada Bravo, H., & Feizi, S. Benchmarking deep learning interpretability in time series predictions. Advances in neural information processing systems, 33, 6441-6452, 2020*

*Zhou, Z., & Hooker, G. Unbiased measurement of feature importance in tree-based methods. ACM Transactions on Knowledge Discovery from Data (TKDD), 15(2), 1-21, 2021*

## Replies to referee 2

This paper describes and evaluates the use of different machine learning algorithms to make short-term forecasts of ground-level air pollution at 4 observational stations in Stockholm, Sweden. While the paper certainly adds to the current literature, and fits within the scope of the journal, the paper lacks some important details and is sometimes difficult to follow. My major comments relate to the need for more clarity on the exact methodology used, particularly with reference to the data processing. Clarity on these details is necessary before publication.

*Reply:*

*Thank the reviewer for taking time to go through our manuscript and for the constructive comments. We have now carefully modified our manuscript based on the reviewer's comments.*

Specific major comments:

1. It is unclear how the data is split for model training, validation and testing. What is the percentage split of this data? Crucially, how was the data split? Was it split randomly, or was it split temporally (if so, what were the dates for the training/test data)? Some details are necessary here, as improper data splitting can lead to over-inflation of model skill results due to data leakage.

*Reply:*

*Data splitting is not random to prevent data leakage. We split the dataset by the TimeSeriesSplit strategy, that is, splitting along the time axis into non-overlapping training, validation, and test data in a ratio of 16:4:5. The validation dataset is the latter 20% of the total training data and the test set is the latter 20% of the total data. This is explained in section 2.4.*

2. Did the authors carry out hyperparameter tuning for their models? If so, did they use a validation set to do this tuning, and then evaluate on a held-out test dataset? Currently there are no details on hyperparameters in the manuscript. It is stated in the conclusion that fine-tuning is possible future work - does this mean that defaults were used for the hyperparameters?

*Reply:*

*The two tree-based models use the default parameters of "scikit-learn". We tune the models using grid search but the performance improvement is not so significant. Especially, the hyper parameters shall be optimized for each dataset. The LSTM model consists of two layers of LSTM, each with 100 neurons, and passed through a fully connected layer before the output. The activation function was a "Tanh". The LSTM model was trained by Adam optimizer. The batch size is set as 72. The initial learning rate is  $1e-2$  and is automatically adjusted using "ReduceLROnPlateau" with*

*the parameter patience set to 10, i.e., training is stopped when the loss of the validation set is detected as not decreasing for 10 consecutive epochs. Specific parameter information has been added to subsection 2.4.*

3. The authors state that the LSTM model is not used to its full potential. I am unclear what this means. As I understand it, the LSTM was not trained to make autoregressive predictions of air pollution, as would typically be the case when forecasting with an LSTM? If this is the case, I imagine this to allow comparison between the LSTM and the tree-based methods. However, this is not really a fair test of the skill of the LSTM, and the possible advantages it provides against tree-based methods. Some clarity on this would be appreciated.

*Reply:*

*Thank you for the comment. A simple LSTM model was deployed in our study for the prototype air quality prediction system. While this paper does not focus on innovative machine learning algorithms, we believe that the deep learning model can be further improved for its prediction accuracy. Indeed, we have been investigating more complex models such as multi-layer LSTM network, and advanced variants of LSTM, such as CNN-LSTM and Bi-LSTM models. But this is beyond the scope of this study.*

4. It is unclear how the feature importances were extracted from the tree-based methods. There are a number of different methods for this. Was this based on permutation-based feature importance, for example? Why was the particular importance method chosen, and what are the drawbacks of using this method? In addition, there are methods to extract feature importances from LSTM models that could be used, to compare against importances from the tree-based models.

*Reply:*

*We have added some details at the end of subsection 2.4 to answer the issue raised by both reviewers.*

*For the RandomForest and XGBoost models, feature importance is ranked based on the mean decrease in impurity (MDI), and it enables feature selections for the models. The low computational cost of this algorithm and the relative accuracy of the results achieved are important reasons for our choice. There are recent studies for unbiased*



*feature importance e.g. (Zhou et al., 2021) but it is beyond the scope of the current study..*

*In addition, we have added gradient-based feature importance results for the LSTM model in which the results are the average of the gradients of all samples in the test set for each dataset, shown in Appendix B and Appendix E.*

5. It is stated that data from the UB site covers around 1000 days, while the street canyon data extends over 500 days. Were the percentage splits of the training and testing data similar for both cases? Given there were fewer data for the street canyon sites, might this affect model performance? Finally, given that the data comes from 2019-2021, might the impact of coronavirus restrictions affect model skill, or model generalisation to future data?

*Reply:*

*UB data and street data use the same data split ratio.*

*The size of the dataset will affect the performance of the model, especially the LSTM model, but we think that the current data set size is sufficient and does not significantly affect the result. The real system will always be trained with the latest incremental data.*

*During the COVID-19 pandemic, there have been obvious mutations in the operation of the city, which also affects the changes in pollutants. We have deployed the model to the forecasting system in Stockholm and retrained the model regularly to ensure the model's ability to generalize to future data.*

Other specific comments:

1. Line 5: some citations for reduced lung function etc. would be welcome.

*Reply:Done.*

2. Line 26-28: 'Although... the challenges of forecasting air pollution concentrations in a longer-term horizon such as a day or even several days have not been investigated'. If this is referring to multi-day daily forecasts of pollutants, this is not true. There is a significant body of work looking at

forecasting air pollution on the time horizon of several days e.g., Kleinert et al, 2022 for ozone.

3. Line 28-29: ‘very few studies have combined deterministic models and ML in forecasting air pollution levels of a few hours/days in the future’. There are some studies that do this. They should be cited here.

*Reply to both comments above:*

*We have modified this sentence:*

*“Forecasting air pollution concentrations in a longer-term horizon such as a day or several days have been investigated by e g Kleinert et al. (2022) for O<sub>3</sub>. Some studies have also combined deterministic models and ML in forecasting air pollution levels of a few hours/days in the future (e g Hong et al., 2022), but mostly for one single pollutant at the time. “*

4. Page 4, line 15: ‘whereas the alternative approach substitutes the missing values with mean values of available data in the neighbourhood’. Substituting with the mean value from the other 3 stations? Or the nearest station?

*Reply:*

*In the pre-processing process, outliers, such as negative pollutant measurements, are identified and removed and furthermore, interpolation are also applied to handle missing values in the data. We have added a short description in subsection 2.1 as follows:*

*“The measurement data with a missing rate of less than 5% and missing values are replaced with mean values of available data in the neighbourhood according to the respective autocorrelation properties.”*

*Specifically, the adjacent data refers to a sample without a missing value near the autoregressive period. For example, the autoregressive period of NO<sub>x</sub> is 24 hours, determined by the autocorrelation diagram and partial autocorrelation diagram, that is, the average value of 24 hours ago and its adjacent data (23 hours ago and 25 hours ago) is calculated and interpolation into the missing value.*

5. Page 5, line 9: ‘are extracted from a location outside the greater Stockholm domain’ - what location?

*Reply: 59.50N, 18.35E. This point is chosen to be close to the boundaries of our greater Stockholm model domain north of Stockholm. There are no real observations at this site.*

6. Page 8, line 15 – missing reference.

*Reply: Corrected.*

7. The metrics used are generally clear and well reported, however, for clarity, it would be good to include bold highlighting of the best performing model for each case in Table 2 and Table 4.

*Reply:*

*Thank the reviewer for this comment. We have updated the Tables and the differences in performance can also be (more easily) seen in the Figures 7 and 12.*

8. Thank you for including the analysis of model performance and high pollutant concentrations. This is important.

Technical comments:

1. Line 26: ‘For O<sub>3</sub> at the urban background site the local photochemistry is? not properly accounted for by the relatively coarse Copernicus Atmosphere Monitoring Service ensemble model (CAMS) used here for forecasting O<sub>3</sub>, but is compensated for using the MLs (ML models?) by taking lagged measurements into account.’ Perhaps?

*Reply: Thank, we have changed accordingly.*

2. Throughout: MLs or machine learning models? MLs is not a common term.
3. The Figure on page 9 has no caption or label.

*Reply:*

*We have revised accordingly.*

4. Conclusion: reflection -> reflecting

*Reply: We have corrected it.*

References

*Hong, H.; Choi, I.; Jeon, H.; Kim, Y.; Lee, J.-B.; Park, C.H.; Kim, H.S. An Air Pollutants Prediction Method Integrating Numerical Models and Artificial Intelligence Models Targeting the Area around Busan Port in Korea. Atmosphere 2022, 13, 1462. <https://doi.org/10.3390/atmos13091462>.*

*Kleinert, F., Leufen, L. H., Lupascu, A., Butler, T., and Schultz, M. G.: Representing chemical history in ozone time-series predictions – a model experiment study building on the MLAir (v1.5) deep learning framework, Geosci. Model Dev., 15, 8913–8930, <https://doi.org/10.5194/gmd-15-8913-2022>, 2022.*
